# Supplementary material for: Political Economy of National HPV Vaccination in Fragile Settings: A Case of Policy Inertia, Financial Constraints, and Equity Gaps in Lebanon
Source: Research Square preprint supplement (doi:10.21203/rs.3.rs-6822046/v1), 2025-07-14
Supplement: Supplementary file 1 [file 75d35d82a59f253f35e5466c.docx]

**Interview Guide**

Background information:

1. To your knowledge, are there any existing policies or guidelines developed in Lebanon related to cervical cancer prevention?
2. Has Lebanon undertaken any previous initiatives related to introducing the HPV vaccination in the national immunization calendar?

Structural factors:

1. What are the main structural factors that facilitate or hinder the introduction of the HPV vaccination from political, economic, and social/cultural perspective?
2. What are other barriers that might affect the introduction of the vaccine?

Decision-making process:

1. How are decisions regarding the introduction of a vaccine in the national calendar, particularly HPV, made within the health sector?
2. In the event of introducing the HPV vaccine to the calendar as mandatory, which is the target population to be covered by MoPH at the initiation of the program and at a later stage?
3. To your knowledge, is there a specific budget allocated for the introduction of new vaccines in the national calendar?

Stakeholders and influence:

1. To your knowledge, who are the key stakeholders involved in the decision making regarding the introduction of the HPV vaccine in the calendar (government, orders, societies, healthcare providers, public funds, pharmaceutical companies, media, etc.)?
2. Amongst those stakeholders, who are the main advocates for policy implementation?
3. Who are the main stakeholders not favouring implementation, and what are their reasons?
4. How would you describe the power dynamics regarding policy implementation?

Opportunities and alternatives:

1. Are there national, regional, or international collaborations or partnerships that Lebanon can leverage to support the introduction of the vaccine?
2. What other opportunities could support the introduction of the vaccine?
3. Can phasing be an option? can we find a framework?

Recommendations and conclusions:

1. What are your recommendations regarding the HPV vaccine introduction as mandatory in the national calendar?
2. In the absence of, or until we have the HPV vaccine included, what other policy options would you recommend?
3. Are there any additional insights or thoughts you would like to share?

Thank you for your time and participation in this interview.
